# Supplementary material for: Linking Time-Use Data to Explore Health Outcomes: Choosing to Vaccinate Against Influenza
Source: Springer Nature journal article supplement (doi:10.1007/s10393-017-1296-z), 2017-11-30
Supplement: MOESM1 [file 15268952]

Table S1. The complete list of activities included in our analysis. Models include correlations between (1) the extensive decision to perform an activity and time spent in a grocery store, (2) the intensive decision to perform an activity and time spent in a grocery store, (3) the extensive decision to perform an activity and vaccination probability, and (4) the intensive decision to perform an activity and vaccination probability. The odds ratio pertains to whether an individual participates in activity subject to spending any time in a grocery store. The odds ratio pertains to whether an individual participates in an activity conditional on spending an additional minute at the grocery store. The odds ratio in (3) pertains to the odds an individual performs an activity subject to spending any time at all on an activity. The risk in (4) pertains to the probability spending an additional minute on an activity subject to being vaccinated. Specific activity codes included are available upon request.

|  | Grocery Store | | | | | | | | Vaccination | | | |
| --- | --- | --- | --- | --- | --- | --- | --- | --- | --- | --- | --- | --- |
|  | Extensive Activity | | | | Intensive Activity | | | | Extensive Activity | | Intensive Activity | |
|  | Odds Ratio | p-value | Odds Ratio | p-value | Odds Ratio | p-value | Odds Ratio | p-value | Odds Ratio | p-value | Risk Ratio | p-value |
| personal care | 1.281 | 1.45 ×10 -14 | 0.998 | 3.02 ×10 -12 | 0.951 | 1.7 ×10 -7 | 1.000 | 0.973 | 0.822 | 0 | 0.970 | 0 |
| personal health care | 0.824 | 1.36 ×10 -3 | 0.999 | 0.175 | 0.526 | 2.45 ×10 -6 | 0.999 | 0.405 | 1.349 | 0 | 1.066 | 0 |
| medical care | 1.579 | 1.75 ×10 -9 | 0.998 | 0.018 | 0.614 | 3.59 ×10 -15 | 1.003 | 1.88 ×10 -8 | 1.191 | 0 | 1.106 | 0 |
| public places | 0.907 | 0.185 | 1.000 | 0.853 | 0.882 | 0.135 | 1.000 | 0.560 | 1.082 | 0 | 1.065 | 0 |
| socializing | 1.326 | 2.96 ×10 -24 | 0.999 | 1.59 ×10 -7 | 0.779 | 1.84 ×10 -18 | 1.001 | 2.81 ×10 -18 | 1.117 | 0 | 1.082 | 0 |
| shopping | 149.5 | 6.69×10 -289 | 1.004 | 0.022 | 0.911 | 4.33×10 -4 | 1.002 | 8.75×10 -11 | 1.002 | 0.85 | 1.11 | 0 |
| hh child education | 1.467 | 6.12 ×10 -13 | 1.000 | 0.542 | 0.932 | 0.223 | 1.000 | 0.587 | 1.221 | 0 | 1.093 | 0 |
| hh child medical | 1.115 | 3.08 ×10 -3 | 1.003 | 1.35 ×10 -24 | 0.920 | 2.67 ×10 -2 | 1.001 | 2.86 ×10 -7 | 1.276 | 0 | 1.084 | 0 |
| hh child super parent | 1.620 | 4.79 ×10 -8 | 1.001 | 0.252 | 0.728 | 1.02 ×10 -2 | 1.001 | 1.815 ×10 -2 | 1.277 | 0 | 1.007 | 0 |
| child care services | 1.255 | 4.43 ×10 -11 | 1.002 | 6.45 ×10 -13 | 0.835 | 6.19 ×10 -11 | 1.001 | 5.26 ×10 -8 | 1.212 | 0 | 1.130 | 0 |
| nhh child | 1.400 | 2.37 ×10 -5 | 0.999 | 0.389 | 0.731 | 1.14 ×10 -2 | 1.000 | 0.691 | 1.110 | 0 | 1.027 | 0 |
| hh adult care | 1.670 | 6.29 ×10 -24 | 1.000 | 0.818 | 0.767 | 6.03 ×10 -5 | 1.002 | 1.43 ×10 -2 | 1.166 | 0 | 1.065 | 0 |
| nhh adult care | 1.374 | 4.65 ×10 -7 | 1.000 | 0.913 | 0.702 | 3.20 ×10 -3 | 1.001 | 0.261 | 1.043 | 0 | 1.024 | 0 |
| cardio sports & activities | 1.465 | 1.21 ×10 -35 | 0.998 | 1.09 ×10 -10 | 0.905 | 6.89 ×10 -5 | 1.002 | 9.13 ×10 -13 | 1.071 | 0 | 1.067 | 0 |
| team sports | 1.370 | 0.154 | 1.000 | 0.727 | 0.715 | 5.39 ×10 -2 | 1.000 | 0.695 | 1.126 | 0 | 1.097 | 0 |
| playing sports | 0.935 | 0.797 | 0.998 | 0.443 | 0.362 | 4.01 ×10 -8 | 1.005 | 3.93 ×10 -6 | 1.044 | 0 | 1.079 | 0 |
| Water sports | 1.223 | 4.57×10 -2 | 1.0002 | 0.778 | 0.712 | 6.56×10 -3 | 1.001 | 6.6×10 -2 | 1.131 | 0 | 0.994 | 0.18 |
| equestrian sports | 2.144 | 0.152 | 0.988 | 3.63 ×10 -2 | 0.487 | 1.7 ×10 -7 | 0.989 | 0.973 | 1.194 | 0 | 1.497 | 0 |
| vehicle touring & racing | 1.267 | 0.659 | 0.996 | 0.565 | 1.664 | 0.34 | 0.998 | 0.824 | 1.293 | 0 | 0.694 | 0 |
| golf | 1.438 | 0.188 | 0.995 | 0.204 | 0.633 | 8.55 ×10 -3 | 1.006 | 2.77 ×10 -3 | 1.154 | 0 | 1.014 | 0 |
| Hunting & fishing | 0.667 | 8.83×10 -2 | 0.998 | 0.329 | 0.805 | 0.422 | 1.000 | 0.902 | 1.155 | 0 | 1.014 | 0.25 |
| Hiking | 2.196 | 8.01×10 -3 | 0.993 | 0.0127 | 1.833 | 0.018 | 0.988 | 4.13×10 -3 | 1.024 | 0.32 | 0.948 | 0.01 |
| billards & bowling | 1.960 | 4.62 ×10 -3 | 0.999 | 0.473 | 0.689 | 2.78 ×10 -2 | 1.003 | 6.2 ×10 -2 | 1.180 | 0 | 0.858 | 0 |
| gambling | 1.134 | 0.572 | 0.998 | 0.457 | 0.670 | 9.58 ×10 -3 | 1.002 | 0.276 | 1.099 | 0 | 0.954 | 0 |
| tobacco & drug use | 1.158 | 0.374 | 0.997 | 0.135 | 1.104 | 0.608 | 1.000 | 0.815 | 0.903 | 0 | 1.185 | 0 |
| Spectating | 0.950 | 0.757 | 0.998 | 0.097 | 0.784 | 3.11×10 -2 | 1.003 | 2.92×10 -3 | 0.989 | 0.07 | 1.016 | 0.01 |
| epicurian activities | 2.237 | 9.98 ×10 -170 | 1.000 | 0.945 | 1.015 | 0.317 | 1.001 | 8.75 ×10 -36 | 1.137 | 0 | 1.124 | 0 |
| religious activities | 1.097 | 371 ×10 -2 | 1.000 | 0.349 | 0.802 | 3.69 ×10 -5 | 1.002 | 1.39 ×10 -4 | 1.042 | 0 | 1.042 | 0 |
| Financial management | 2.357 | 8.79×10 -83 | 0.999 | 3.46×10 -3 | 0.736 | 3.00×10 -6 | 1.003 | 2.67×10 -7 | 1.001 | 0.31 | 1.067 | 0 |
| animal care | 1.491 | 1.33 ×10 -2 | 0.999 | 0.358 | 0.727 | 0.107 | 0.999 | 0.718 | 1.184 | 0 | 1.055 | 0 |
| vehicle maintenance | 1.775 | 2.22 ×10 -17 | 0.998 | 1.03 ×10 -2 | 0.737 | 9.16 ×10 -6 | 1.000 | 0.413 | 0.981 | 0 | 1.086 | 0 |
| household care | 2.592 | 6.50 ×10 -166 | 1.002 | 9.18 ×10 -8 | 0.822 | 1.21 ×10 -35 | 1.001 | 7.77 ×10 -39 | 1.143 | 0 | 1.104 | 0 |
| household care services | 4.011 | 1.16 ×10 -23 | 0.995 | 2.16 ×10 -3 | 0.500 | 1.36 ×10 -7 | 1.007 | 5.88 ×10 -7 | 1.066 | 0 | 1.134 | 0 |
| study & research | 1.018 | 0.868 | 0.997 | 4.31 ×10 -3 | 0.868 | 8.83 ×10 -2 | 1.001 | 2.75 ×10 -2 | 1.741 | 0 | 1.112 | 0 |
| education & class | 0.810 | 7.84 ×10 -2 | 0.997 | 6.87 ×10 -3 | 0.751 | 6.21 ×10 -3 | 1.002 | 7.56 ×10 -3 | 1.681 | 0 | 1.075 | 0 |
| volunteerism | 1.458 | 1.12 ×10 -10 | 0.997 | 1.98 ×10 -6 | 0.753 | 4.39 ×10 -5 | 1.002 | 7.08 ×10 -6 | 1.125 | 0 | 1.070 | 0 |
| hobbies & leisure | 1.535 | 6.57 ×10 -20 | 1.001 | 3.62 ×10 -2 | 0.953 | 1.94 ×10 -4 | 1.001 | 1.31 ×10 -7 | 1.110 | 0 | 1.112 | 0 |
| Income generating activities | 1.771 | 1.82×10 -2 | 0.993 | 0.030 | 0.817 | 0.219 | 1.005 | 1.40×10 -4 | 1.034 | 0.57 | 1.062 | 0 |
| job search | 1.565 | 5.45 ×10 -5 | 1.000 | 0.804 | 0.791 | 2.31 ×10 -2 | 1.003 | 1.65 ×10 -4 | 0.391 | 0 | 0.957 | 0 |
| work | 0.853 | 8.81 ×10 -6 | 0.996 | 1.70 ×10 -28 | 0.856 | 7.98 ×10 -25 | 1.000 | 4.16 ×10 -2 | 0.383 | 0 | 0.984 | 0 |
| grocery | 1149.260 | 0 | 1.003 | 1.74 ×10 -4 | 0.787 | 7.34 ×10 -7 | 1.002 | 1.48 ×10 -16 | 1.057 | 0 | 1.083 | 0 |
| Grocery Store | 1.398×10 23 | 0 | 1.000 | 3.52×10 -3 | NA | 3.07×10 -18 | 1.002 | 0.425 | 1.051 | 0 | 1.083 | 0 |

Table S2. ATUS Categorized Activity Codebook

| **Activity category and activity codes** | **Activities included in Category** | | **OBSERVATIONS** |
| --- | --- | --- | --- |
| **Personal Care** |  | | **115351** |
| 10201 | washing, dressing, and grooming oneself |  | **109395** |
|  | bathing/showering | washing face |  |
|  | brushing/flossing teeth | washing hands |  |
|  | grooming | putting in contact lenses |  |
|  | blow-drying hair | shaving legs |  |
|  | putting on pajamas | cleaning contact lenses |  |
|  | putting on makeup | washing hair |  |
|  | shaving | filing nails |  |
|  | getting dressed/undressed | combing hair |  |
|  | changing clothes | gargling mouthwash |  |
|  | laying clothes out | putting on shoes |  |
|  | putting on hand cream | removing curlers |  |
|  | perming own hair | putting on night cream |  |
|  | doing own hair | cutting own hair |  |
|  | running bath | washing feet |  |
|  | doing nails | cleaning ears |  |
|  | putting on nail polish | brushing lint off clothing |  |
|  | using the bathroom |  |  |
| 10299 | grooming |  | 64 |
|  | mom braided my hair | friend rubbed suntan lotion on me |  |
|  | getting a haircut from spouse/friend (unpaid) |  |  |
| 80501 | using personal care services |  | 1463 |
|  | getting a haircut | talking to/with the hair stylist |  |
|  | having nails done | talking to/with the manicurist |  |
|  | having a facial | having a pedicure |  |
|  | having a massage | getting hair done |  |
|  | paying for a haircut | getting a tan at the tanning salon |  |
| 80502 | waiting associated with personal care services |  | 195 |
|  | waiting for the barber |  |  |
| 180101 | travel related to personal care |  | 2150 |
| 180805 | travel related to using personal care services |  | 1979 |
| 180899 | travel relative to using professional & personal care services |  | 105 |
| **Personal Health Care** |  |  | **9216** |
| 10301 | health-related self care |  | 9052 |
|  | doing childbirth exercises | meditating (not religious) |  |
|  | dressing a wound | taking vitamins |  |
|  | giving oneself a shot | resting because of injury |  |
|  | taking insulin | taking cough drops |  |
|  | putting ice on injury | bandaging ankle |  |
|  | gargling for sore throat | giving oneself an injection |  |
|  | resting because of illness | testing blood sugar level |  |
|  | taking medicine | applying ointment |  |
|  | doing stress management exercises | changing oxygen |  |
|  | exercising or therapy for medical reasons |  |  |
| 10399 | self care |  | 164 |
|  | feeling sick |  |  |
| **Medical Care** |  |  | **6709** |
| 80401 | using health and care services outside the home |  | 2442 |
|  | having dental work done | talking to/with a pharmacist |  |
|  | having an eye exam | having wisdom teeth removed |  |
|  | having inpatient treatment | attending group therapy |  |
|  | having outpatient treatment | having acupuncture |  |
|  | having a doctor's appointment | talking to/with a doctor |  |
|  | having a physical | talking to/with a nurse |  |
|  | seeing a psychologist | talking to/with a healthcare practitioner |  |
|  | receiving physical therapy | purchasing adult daycare |  |
|  | seeing a chiropractor | paying for adult care services |  |
|  | making a co-payment | paying for long-term care |  |
|  | paying for healthcare services | purchasing elder care services |  |
|  | talking to/with a physical therapist | purchasing hospice/respite care |  |
|  | talking to/with a psychologist | checking out adult care facility |  |
|  | paying the doctor |  |  |
| 80402 | using in-home health and care services |  | 23 |
|  | receiving in-home healthcare | hiring someone to look after hh adult |  |
| 80403 | waiting associated with medical services |  | 1023 |
|  | waiting at the physician's office | waiting for surgery |  |
|  | waiting for lab test results |  |  |
| 180804 | travel related to using medical services |  | 3221 |
| **Public Places** |  |  | **7033** |
| 120403 | attending movies/film |  | 1280 |
|  | attending the movies |  |  |
| 120401 | attending performing arts |  | 556 |
|  | attending comedy club | attending plays |  |
|  | attending opera | attending musicals |  |
|  | attending a concert | attending the theater |  |
|  | attending the ballet | attending jazz bar |  |
|  | attending dance troupe performances |  |  |
| 120402 | attending museums |  | 326 |
|  | attending an art gallery | attending an arboretum |  |
|  | visiting the zoo | attending a botanical garden |  |
|  | attending exhibitions |  |  |
| 120499 | arts & entertainment |  | 1191 |
|  | attending an art/history/music lecture | setting off fireworks |  |
|  | taking a guided nature walk | visiting historic sites |  |
|  | attending a flower show | attending the county fair |  |
|  | attending an amusement park | attending the circus |  |
|  | attending a festival | attending a carnival |  |
|  | attending a poetry reading | watching a parade/fireworks |  |
|  | attending a book signing | attending an auto show |  |
| 120504 | waiting associated with arts & entertainment |  | 156 |
| 181204 | travel related to arts and entertainment |  | 3524 |
| **Socializing** |  |  | 60609 |
| 120101 | socializing and communicating with others |  | 30378 |
|  | entertaining family | hugging/kissing acquaintances/others |  |
|  | hanging out with family | greeting other parents |  |
|  | spending time with family | hugging/kissing neighbors |  |
|  | talking with family | giving gifts to friends |  |
|  | arguing with family | giving presents to adults |  |
|  | greeting family | opening birthday presents (with others) |  |
|  | hugging or kissing family | opening Christmas gifts (with others) |  |
|  | visiting with family | opening gifts (with others) |  |
|  | accompanying family while they run errands | opening wedding presents (with others) |  |
|  | entertaining friends | visiting household/nonhh adult in hospital |  |
|  | hanging out with friends | visiting adult in nursing home |  |
|  | spending time with friends | accompanying family/friends to look at  family/friend's new house |  |
|  | talking with friends | talking with neighbors |  |
|  | arguing with friends | talking to/with other parents |  |
|  | greeting friends | talking with acquaintances |  |
|  | hugging/kissing friends | greeting neighbors/acquaintances |  |
|  | visiting with friends | accompanying friends while they run errands |  |
| 120201 | attending or hosting parties/receptions/ceremonies |  | 2657 |
|  | attending graduation ceremonies (for adults) | attending birthday parties |  |
|  | attending a charity social event | attending bachelor/ette party |  |
|  | attending receptions | attending housewarming |  |
|  | attending parties | attending holiday open house |  |
| 120501 | waiting associated with socializing & communicating |  | 89 |
| 181201 | travel related to socializing and communicating |  | 23972 |
| 181202 | travel related to attending or hosting social events |  | 3513 |
| **Shopping** |  |  | **130433** |
| 70101 | grocery shopping |  | 20603 |
|  | buying/ordering/paying for groceries | talking to the produce manager |  |
|  | ordering groceries online |  |  |
| 70102 | purchasing gas |  | 5399 |
|  | buying gas/paying for gasoline | talking to gas station attendant |  |
|  | pumping gas |  |  |
| 70103 | purchasing food (not groceries) |  | 13383 |
|  | paying the pizza delivery person | paying for meal at restaurant |  |
|  | paying check for a meal/drink/snack | picking up take-out food |  |
|  | buying fast food | placing order at a deli/fast food place |  |
|  | paying for fast food at drive-through | talking to fast food cashier/talking to the waiter |  |
| 70104 | shopping, except groceries, food and gas |  | 29401 |
|  | buying movie tickets | paying for purchases |  |
|  | browsing/shopping but not yet buying | paying for movie tickets |  |
|  | shopping at warehouse stores (Wal-Mart, Costco, Super-K, etc.) | buying/ordering clothes |  |
|  | shopping at mall | buying books/CDs/other items |  |
|  | ordering products | looking at products |  |
|  | shopping at e-bay/flea markets/auctions | shopping at yard sales |  |
|  | shopping for a new or used car | buying gardening supplies |  |
|  | test-driving a vehicle | renting a tuxedo |  |
|  | buying/paying for a new or used car | renting a rug shampooer |  |
|  | checking out of hotel/motel/B&B | renting lawn equipment |  |
|  | browsing/shopping at fundraisers | ordering concert tickets/ordering football tickets |  |
|  | dropping off products for repairs | visiting a book fair |  |
|  | buying everyday consumer goods | talking to the salesclerk |  |
|  | buying a pet | returning videotapes to store/renting a movie |  |
|  | buying appliances | picking up prescriptions/film |  |
|  | renting products | looking through catalogs |  |
|  | returning consumer goods | looking at products in catalogs |  |
|  | renting a car/truck/van | buying postage stamps |  |
|  | paying for a rental car/truck/van | window shopping |  |
|  | buying airline tickets online | checking into hotel/motel/B&B |  |
| 70105 | waiting associated with shopping |  | 398 |
|  | waiting in line to purchase groceries | waiting in line to pay for goods/buy gas |  |
| 70201 | comparison shopping |  | 159 |
|  | researching items/prices/availability | browsing through circulars |  |
|  | reading product reviews | comparing prices at different stores |  |
|  | comparison shopping on the Internet |  |  |
| 180701 | travel related to grocery shopping |  | 20690 |
| 180782 | travel related to consumer purchases |  | 40400 |
| **HH Child Education** |  |  | 5952 |
| 30201 | homework (hh children) |  | 5326 |
|  | helping hh child with homework | signing hh child's homework log |  |
|  | reviewing hh child's homework | checking hh child's homework for completion |  |
|  | helping hh child with a school project | picking up hh child's books/assignments |  |
|  | quizzing hh child before a test |  |  |
| 30202 | meetings and school conferences (hh children) |  | 358 |
|  | observing hh child's class | meeting with guidance counselor of hh child |  |
|  | attending hh child's parent-teacher conference | meeting with guidance counselor of hh child |  |
|  | attending hh child's back-to-school night | talking to/with hh child's tutor |  |
|  | meeting w/school psychologist of hh child | meeting with hh child's tutor |  |
|  | talking with teachers of hh child | attending hh child's school open house |  |
|  | attending a PTA meeting | meeting w/school speech pathologist of hh child |  |
| 30299 | activities related to hh child's education |  | 105 |
| 30203 | home schooling of hh children |  | 163 |
| **HH Child Personal Care** |  |  | **27909** |
| 30101 | physical care for hh children |  | 27909 |
|  | dressing/bathing hh child | feeding hh child |  |
|  | changing hh child's diapers | cutting hh child's hair |  |
|  | helping hh child get dressed/brush teeth/bathe | preparing a shower for a hh child |  |
|  | breastfeeding/nursing hh baby | soothing hh child/baby |  |
|  | laying out clothes for hh child | tucking in hh child |  |
|  | giving hh child a bottle | getting hh child up |  |
|  | getting hh child ready to go somewhere | helping hh child feed him/herself |  |
|  | waking hh child | helping hh child use the bathroom |  |
|  | getting hh child ready for bed | drawing a bath for a hh child |  |
|  | putting hh child to bed | giving hh child a bath |  |
|  | rocking/cuddling/holding hh child | getting hh child ready for school |  |
|  | carrying hh child/baby |  |  |
| **HH Child Medical Care** |  |  | **1935** |
| 30301 | providing medical care to hh children |  | 997 |
|  | taking hh child's temperature | giving hh child medicine |  |
|  | putting medicine on hh child's cuts | sitting with sick hh child |  |
|  | giving hh child's insulin shot | putting medicine on hh child's burn |  |
|  | bandaging hh child's scrapes | bandaging hh child's cuts/burns |  |
|  | helping hh child w/physical therapy |  |  |
| 30302 | obtaining medical care for hh children |  | 580 |
|  | accompanying hh child to medical appt | talking with hh child's nurse |  |
|  | talking with hh child's doctor |  |  |
| 30303 | waiting associated with hh children's health |  | 358 |
|  | waiting while doctor examines hh child | waiting with hh child at physician's office |  |
|  | waiting with hh child at hospital |  |  |
| **HH Child "Super Parent"** |  |  | 47311 |
| 30102 | reading to/with hh children |  | 5403 |
|  | reading to/with hh children | helping hh child read |  |
|  | reading to or with hh child | teaching hh child to read |  |
| 30103 | listening to a hh child read |  | 10442 |
|  | playing with hh children, not sports | horsing around with hh child |  |
|  | playing with hh child | dancing with hh child |  |
|  | tickling hh child | entertaining hh child |  |
|  | playing games w/hh child only | giving hh child a piggyback ride |  |
| 30104 | Arts and crafts with hh children |  | 239 |
|  | arts and crafts with hh children | organizing coin collection with hh child |  |
|  | making holiday decorations w/hh child | building model planes with hh child |  |
|  | helping hh child make arts and crafts |  |  |
| 30105 | playing sports with hh children |  | 700 |
|  | riding bikes with hh child | playing basketball with hh child |  |
|  | strolling with a hh child | teaching hh child how to play a sport |  |
|  | teaching hh child to ride a bike | walking with a hh child |  |
| 30108 | organization & planning for hh children |  | 2022 |
|  | planning parties/activities/events for hh child | helping with parties for hh child |  |
|  | making costume for hh child | organizing activities for hh child |  |
|  | packing/unpacking hh child's bag | signing hh child up for activities |  |
|  | planning play dates for hh child |  |  |
| 30109 | looking after hh children (as a primary activity) |  | 4298 |
| 30110 | attending hh children's events |  | 2262 |
|  | watching hh child's sporting event or school play | attending hh child's recital |  |
| 30111 | waiting for/with hh children |  | 2225 |
|  | waiting to pick up hh child | waiting for hh child to get ready |  |
|  | waiting for school bus with hh child | waiting for hh child to finish his/her activity |  |
| 30112 | picking up/dropping off hh children |  | 13714 |
|  | dropping off hh child at friend's house | dropping off hh child at babysitter's |  |
|  | picking up hh child from day care/school/church | dropping off hh child at soccer practice |  |
| 30186 | talking with/listening to hh children |  | 5479 |
| 30199 | caring for & helping hh children |  | 323 |
|  | adopting a child |  |  |
| 80101 | using paid childcare services |  | 204 |
|  | hiring a nanny or babysitter | paying for lessons, instructions |  |
|  | paying for daycare | paying for tutorial services |  |
|  | checking out daycare facility | hiring a tutor |  |
|  | paying for summer camp | paying for after school care program |  |
|  | talking to/with the daycare provider | meeting with daycare providers |  |
|  | talking to/with the camp counselor | talking to/with babysitter |  |
| **NHH Child Care** |  |  | **3805** |
| 40101 | physical care for nonhh children |  | 503 |
|  | dressing/bathing nonhh child | feeding nonhh child |  |
|  | changing nonhh child's diapers | cutting nonhh child's hair |  |
|  | laying out clothes for nonhh child | preparing a shower for nonhh child |  |
|  | giving nonhh child a bottle | soothing nonhh child/baby |  |
|  | getting nonhh child ready to go somewhere | tucking in nonhh child |  |
|  | waking nonhh child | helping nonhh child feed him/herself |  |
|  | putting nonhh child to bed | helping nonhh child use the bathroom |  |
|  | cuddling/rocking/holding nonhh child | drawing a bath for nonhh child |  |
|  | carrying nonhh child/baby | helping nonhh child get dressed/brush teeth/bathe |  |
| 40102 | reading to/with nonhh children |  | 41 |
|  | reading to or with nonhh children | helping nonhh child read |  |
|  | listening to a nonhh child read | teaching nonhh child to read |  |
| 40103 | playing with nonhh children, not sports |  | 607 |
|  | playing with nonhh child | horsing around w/nonhh child |  |
|  | tickling nonhh child | dancing with nonhh child |  |
|  | playing games w/nonhh child only | entertaining nonhh child |  |
|  | giving nonhh child a piggyback ride |  |  |
| 40108 | organization & planning for nonhh children |  | 64 |
|  | planning party/activities for nonhh child | helping w/party for nonhh child |  |
|  | making costumes for nonhh child | organizing activities for nonhh child |  |
|  | packing/unpacking nonhh child's bag | signing nonhh child up for activities |  |
|  | planning play dates for nonhh child |  |  |
| 40109 | looking after nonhh children (as primary activity) |  | 268 |
|  | supervising/monitoring/keeping tabs on nonhh child | checking on nonhh child |  |
|  | watching but not interacting w/nonhh child | supervising nonhh child swimming |  |
|  | accompanying nonhh child trick-or-treating | accompanying nonhh child visiting Santa Claus |  |
| 40110 | attending nonhh children's events |  | 226 |
|  | watching nonhh child's sporting event or school play | attending nonhh child's recital |  |
| 40111 | waiting for/with nonhh children |  | 169 |
|  | waiting to pick up nonhh child | waiting for nonhh child to get ready |  |
|  | waiting for school bus with nonhh child | waiting for nonhh child to finish his/her activity |  |
| 40112 | dropping off/picking up nonhh children |  | 1719 |
|  | dropping off nonhh child at friend's house | dropping off nonhh child at babysitter's |  |
|  | picking up nonhh child from day care/school | dropping off nonhh child at soccer practice |  |
| 40186 | talking with/listening to nonhh children |  | 165 |
| 40201 | homework (nonhh children) |  | 43 |
|  | helping a nonhh child w/homework | signing nonhh child's homework log |  |
|  | reviewing nonhh child's homework | checking nonhh child's homework |  |
|  | helping nonhh child with sch. project | picking up nonhh child's books/assignments |  |
|  | quizzing nonhh child before a test |  |  |
| **HH Adult Care** |  |  | **10196** |
| 30401 | physical care for hh adults |  | 1683 |
|  | bathing hh adult | putting hh adult to bed |  |
|  | feeding hh adult | providing physical aid to hh adult |  |
|  | dressing hh adult | helping hh adult dress |  |
|  | getting hh adult ready to go somewhere | cutting hh adult's hair |  |
|  | waking hh adult |  |  |
| 30402 | looking after hh adult (as a primary activity) |  | 150 |
|  | supervising hh adult | checking on hh adult |  |
|  | monitoring hh adult |  |  |
| 30403 | providing medical care to hh adult |  | 498 |
|  | giving hh adult medicine | bandaging hh adult |  |
| 30404 | obtaining medical and care services for hh adult |  | 197 |
|  | accompanying hh adult to medical appt. | meeting with adult care provider |  |
|  | talking to hh adult's doctors/nurses | talking to/with adult daycare provider |  |
| 30405 | waiting associated with caring for household adults |  | 222 |
|  | waiting while doctor examines hh adult | waiting with hh adult at hospital |  |
|  | waiting with hh adult at physician's office | waiting to meet a hh adult's care provider |  |
| 30501 | helping hh adults |  | 445 |
|  | helping hh adult w/computer | shopping for hh adult (not self) |  |
|  | helping hh adult w/taxes/bills |  |  |
| 30502 | organization & planning for hh adults |  | 250 |
|  | planning activities for hh adult | packing hh adult's bags |  |
|  | organizing parties for hh adult | planning events for hh adult |  |
|  | making things for hh adult | planning parties for hh adult |  |
| 30503 | picking up/dropping off hh adult |  | 2841 |
|  | dropping hh adult off at senior center | picking up hh adult from hh adult's event |  |
| 30504 | waiting associated with helping hh adults |  | 841 |
|  | waiting to pick up hh adult |  |  |
| 30599 | helping household adults, n.e.c.* |  | 95 |
|  | waiting for hh adult to get ready |  |  |
| 180382 | travel related to caring for and helping hh adults |  | 2974 |
| **NHH Adult Care** |  |  | **5529** |
| 40401 | physical care for nonhh adults |  | 116 |
|  | bathing nonhh adult | putting nonhh adult to bed |  |
|  | feeding nonhh adult | providing physical aid to nonhh adult |  |
|  | dressing nonhh adult | helping nonhh adult dress |  |
|  | getting nonhh adult ready to go somewhere | cutting nonhh adult's hair |  |
|  | waking nonhh adult |  |  |
| 40403 | providing medical care to nonhh adult |  | 38 |
|  | giving nonhh adult medicine | bandaging nonhh adult |  |
| 40404 | obtaining medical and care services for nonhh adult |  | 27 |
|  | accompanying nonhh adult to medical appt. | meeting w/nonhh adult care provider |  |
|  | talking to nonhh adult's doctors/nurses | talking to/with nonhh adult care provider |  |
| 40405 | waiting associated with caring for nonhh adults |  | 79 |
|  | waiting while doctor examines nonhh adult | waiting with nonhh adult at hospital |  |
|  | waiting with nonhh adult at physician's office | waiting to meet a nonhh adult care provider |  |
| 40501 | housework, cooking, & shopping assistance for nonhh adults |  | 596 |
|  | doing housework for nonhh adult | shopping for nonhh adult (not self) |  |
|  | doing laundry for nonhh adult (not self) | cooking/preparing food for nonhh adult |  |
| 40502 | house & lawn maintenance & repair assistance for nonhh adults |  | 515 |
|  | mowing the lawn for nonhh adult | mending fence for nonhh adult |  |
|  | fixing plumbing leak for nonhh adult | painting house for nonhh adult |  |
|  | disposing of trash for nonhh adult |  |  |
| 40503 | animal & pet care assistance for nonhh adults |  | 337 |
|  | feeding pets for nonhh adult | walking dog for nonhh adult |  |
|  | bathing dog for nonhh adult |  |  |
| 40504 | vehicle & appliance maintenance/repair assistance for nonhh adults |  | 170 |
|  | changing tires for nonhh adult | fixing computer for nonhh adult |  |
|  | adjusting brakes for nonhh adult | fixing car for nonhh adult |  |
|  | fixing appliances for nonhh adult | maintaining sports equipment for nonhh adults |  |
| 40505 | financial management assistance for nonhh adults |  | 83 |
|  | helping nonhh adult w/computer applications | helping nonhh adult w/taxes/bills |  |
| 40506 | household management & paperwork assistance for nonhh adults |  | 415 |
|  | running errands for nonhh adult (not self) | packing nonhh adult's bags |  |
|  | planning activities for nonhh adult | planning events for nonhh adult |  |
|  | organizing party for nonhh adult | planning party for nonhh adult |  |
|  | making things for nonhh adult | doing paperwork for nonhh adult |  |
| 40507 | picking up/dropping off nonhh adult |  | 2301 |
|  | dropping nonhh adult off at senior center | picking up nonhh adult from adult's event |  |
| 40508 | waiting associated with helping nonhh adults |  | 640 |
|  | waiting to pick up nonhh adult | waiting for nonhh adult to get ready |  |
| 40599 | helping nonhh adults, n.e.c.* |  | 212 |
| **Cardio Sports & Activities** |  |  | **36436** |
| 130101 | doing aerobics |  | 370 |
|  | doing step aerobics | doing low-impact aerobics |  |
|  | doing high-impact aerobics | talking to aerobics instructor |  |
|  | Zumba |  |  |
| 130104 | biking |  | 678 |
|  | registering for a bike race |  |  |
| 130109 | dancing |  | 141 |
| 130119 | participating in martial arts |  | 59 |
|  | doing karate | talking to martial arts instructor |  |
|  | doing kickboxing |  |  |
| 130120 | Playing racquet sports |  | 95 |
|  | playing tennis | playing badminton |  |
|  | playing squash | talking to the tennis coach |  |
|  | playing handball | playing lacrosse |  |
|  | playing racquetball |  |  |
| 130122 | rollerblading |  | 46 |
|  | roller-skating | skateboarding |  |
| 130124 | running |  | 1354 |
|  | jogging | talking to race officials |  |
|  | running a marathon | running cross country |  |
|  | running a race/organized run |  |  |
| 130125 | skiing, ice skating, snowboarding |  | 122 |
|  | snow tubing |  |  |
| 130128 | using cardiovascular equipment |  | 2180 |
|  | using the Stairmaster | riding stationary bicycle |  |
|  | using the treadmill | spinning |  |
|  | using the rowing machine |  |  |
| 130131 | walking |  | 6280 |
| 130133 | weightlifting/strength training |  | 1630 |
|  | lifting weights | bodybuilding |  |
| 130134 | working out, unspecified |  | 3668 |
|  | stretching | doing cardio (unspecified) |  |
| 130136 | doing yoga |  | 299 |
|  | pilates | talking to the yoga instructor |  |
| 20681 | walking / exercising / playing with animals |  | 19514 |
| **Team Sports** |  |  | **361** |
| 130102 | playing baseball |  | 51 |
|  | talking to baseball coach |  |  |
| 130103 | playing basketball |  | 142 |
|  | talking to basketball referee |  |  |
| 130113 | playing football |  | 33 |
|  | playing touch football | talking to the football referee |  |
|  | playing flag football |  |  |
| 130126 | playing soccer |  | 58 |
| 130127 | softball |  | 36 |
|  | playing wiffle ball |  |  |
| 130130 | volleyball |  | 41 |
|  | playing Wally ball |  |  |
| **Playing Sports** |  |  | **469** |
| 130199 | playing sports |  | 469 |
|  | bungee jumping | ping-pong |  |
|  | cricket | table tennis |  |
|  | tai chi | horseshoes |  |
|  | paintball | croquet |  |
|  | baton twirling | archery |  |
|  | curling | skeet-shooting |  |
|  | cheerleading | target practice |  |
|  | footbag | throwing darts |  |
|  | setting up camping tent | boxing |  |
|  | starting a campfire | shooting league |  |
|  | digging a latrine | javelin |  |
|  | collecting firewood for camp | pole vaulting |  |
|  | playing in the snow | discus |  |
|  | ballooning | playing Frisbee golf |  |
|  | skydiving | throwing a Frisbee |  |
|  | windsurfing | hang-gliding |  |
|  | kite flying |  |  |
| **Water Sports** |  |  | **1765** |
| 130106 | boating |  | 201 |
|  | sailing | yachting |  |
|  | kayaking | rafting |  |
|  | canoeing | crewing |  |
| 130132 | participating in water sports |  | 1564 |
|  | swimming | river tubing |  |
|  | playing water polo | surfing |  |
|  | diving | body surfing |  |
|  | waterskiing | boogie-boarding |  |
|  | snorkeling | talking to the swimming coach |  |
|  | scuba diving | water aerobics |  |
| **Equestrian Sports** |  |  | **62** |
| 130110 | participating in equestrian sports |  | 62 |
|  | horseback riding | playing polo |  |
|  | steeple chase |  |  |
| **Vehicle Touring & Racing** |  |  | **128** |
| 130129 | vehicle touring/racing |  | 128 |
|  | stock car racing | 4-wheeling |  |
|  | drag racing | riding in a go-cart |  |
|  | doing motocross | riding in or driving a dune buggy |  |
|  | snowmobiling |  |  |
| **Golf** |  |  | **344** |
| 130114 | golf |  | 344 |
|  | playing the front 9 | practicing putting |  |
|  | playing the back 9 | talking to the caddy |  |
|  | hitting balls at the driving range |  |  |
| **Hunting & Fishing** |  |  | **643** |
| 130112 | fishing |  | 418 |
|  | deep-sea fishing | clam-digging |  |
|  | fly fishing | talking to the boat captain |  |
|  | crabbing |  |  |
|  | clam-digging |  |  |
|  | talking to the boat captain |  |  |
| 130118 | hunting |  | 225 |
|  | hunting game | hunting ducks |  |
|  | hunting deer/elk | talking to the hunting guide |  |
| **Hiking** |  |  | **182** |
| 130116 | hiking |  | 182 |
| **Billards & Bowling** |  |  | **247** |
| 130105 | playing billiards |  | 113 |
|  | shooting pool | playing snooker |  |
| 130107 | bowling |  | 134 |
|  | playing duck pins | playing ten pins |  |
| **Gambling** |  |  | **353** |
| 120404 | attending a gambling establishment |  | 353 |
|  | gambling | playing craps |  |
|  | attending a casino | playing keno |  |
|  | betting on the horses |  |  |
| **Tobacco & Drug Use** |  |  | **1604** |
| 120302 | tobacco and drug use |  | 1604 |
|  | smoking a cigarette/cigar/pipe | smoking marijuana/pot/weed |  |
|  | having a cigarette/rolling a cigarette | chewing tobacco/using recreational drugs |  |
| **Spectating** |  |  | **2147** |
| 130202 | watching baseball |  | 177 |
| 130203 | watching basketball |  | 214 |
| 130213 | watching football |  | 197 |
|  | watching touch football | watching tag football |  |
| 130216 | watching hockey |  | 57 |
|  | watching ice hockey | watching field hockey |  |
| 130224 | watching soccer |  | 127 |
| 130225 | watching softball |  | 56 |
|  | watching wiffle ball |  |  |
| 130226 | watching vehicle touring/racing |  | 53 |
|  | watching a stock car race | watching snowmobiling |  |
|  | watching a drag race | watching 4-wheeling |  |
|  | watching a motocross race |  |  |
| 130299 | attending a sporting event |  | 68 |
|  | watching discus | watching ping-pong |  |
|  | watching hang-gliding | watching croquet game |  |
|  | watching ballooning | watching archery |  |
|  | watching skydiving | watching skeet-shooting |  |
|  | watching windsurfing | watching dart playing |  |
|  | watching bungee jumping | watching boxing |  |
|  | watching baton twirling | watching javelin |  |
|  | watching cheerleading | watching pole vaulting |  |
| 130302 | waiting related to attending sporting events |  | 32 |
| 181302 | travel related to attending sporting/recreational events |  | 1166 |
| **Epicurean Activities** |  |  | **106227** |
| 20201 | food and drink preparation |  | 73691 |
|  | baking/cooking/broiling/boiling | cooking dinner |  |
|  | defrosting | peeling potatoes |  |
|  | packing food/lunches/picnics | preparing salad |  |
|  | making baby food | baking a cake/baking biscuits |  |
|  | mixing/heating up baby formula | chopping/slicing vegetables |  |
|  | mixing drinks | putting roast in oven |  |
|  | making coffee/tea | smoking fish |  |
|  | heating food up/cooking meals | dehydrating food/drying food |  |
|  | preparing food for company/guests | thawing frozen food |  |
|  | canning food/preserving food | putting icing on cake |  |
|  | preparing food for other hh members | boiling water |  |
|  | getting a drink/pouring water in glass | butchering/carving/salting meat |  |
|  | brewing beer or wine | making a gingerbread house |  |
|  | breast-pumping | making jam/bottling fruit |  |
|  | baking Christmas cookies |  |  |
| 20203 | kitchen and food clean up |  | 32536 |
|  | cleaning up after a meal/clearing the table | cleaning oven/stove/barbecue grill |  |
|  | loading the dishwasher/emptying dishwasher | cleaning high chair |  |
|  | washing/drying dishes | cleaning up plates and food |  |
|  | putting leftovers away | wiping table |  |
|  | cleaning up the kitchen only | rinsing dishes/washing pots and pans |  |
|  | cleaning kitchen cupboard | putting dishes away |  |
|  | cleaning freezer/defrosting freezer | throwing away leftovers |  |
|  | cleaning refrigerator | mopping the kitchen floor |  |
|  | cleaning microwave oven |  |  |
| **Religious Activities** |  |  | **25629** |
| 120304 | television (religious) |  | 331 |
|  | watching religious broadcasting |  |  |
| 140101 | attending religious services |  | 8695 |
|  | attending church services/synagogue/temple/mosque | leading blessings |  |
|  | attending funerals/attending wakes, memorial services | attending/participating in weddings |  |
|  | attending/hearing confession | attending church revival |  |
|  | attending a bar mitzvah/bat mitzvah/briss | attending a blessing |  |
|  | attending a baptism/christening | attending confirmation service |  |
| 140102 | participation in religious practices |  | 5721 |
|  | reading the Bible/Koran/Torah/Talmud/scriptures | lighting advent wreath |  |
|  | studying the Bible/Koran/sciptures | praying alone |  |
|  | ushering for religious services | saying prayers for a Seder |  |
|  | singing in the church choir | leading church choir, musical groups |  |
|  | visiting graves/putting flowers on graves | playing the church organ |  |
|  | rehearsing/decorating for religious ceremonies | participating in church musical performance |  |
|  | attending a wedding rehearsal | opening advent calendar day |  |
|  | cleaning up after religious ceremonies | conducting religious rites in the home |  |
|  | attending church choir practice | meditating for religious purposes |  |
|  | attending a religious retreat | preparing the sacrament/communion |  |
|  | praying with others | lighting menorah candles (Hanukkah) |  |
|  | preparing food for a Seder | attending Passover Seder |  |
|  | praying with hh child | praying with nonhh child |  |
| 140103 | waiting associated w/religious & spiritual activities |  | 274 |
|  | waiting associated w/ religious & spiritual activities |  |  |
| 140105 | religious education activities |  | 735 |
|  | attending confirmation class/attending Sunday school | teaching Sunday school |  |
|  | attending Bible study | preparing materials for Bible study |  |
|  | teaching/leading Bible study | teaching bat/bar mitvah class |  |
|  | distributing religious literature | attending pre-Cana class |  |
|  | reading (other: confirmation class) | leading religious youth group |  |
|  | memorizing verses for confirmation class | reading/studying scriptures for Sunday school |  |
| 149999 | religious and spiritual activities, n.e.c.* |  | 29 |
| 181401 | travel related to religious/spiritual practices |  | 9844 |
| **Financial Management** |  |  | **13222** |
| 20901 | fiancial management |  | 5775 |
|  | paying the rent/mortgage/bills | writing checks |  |
|  | using computer to pay bills | filing receipts |  |
|  | making a budget/using computer to keep budget | filling out tax forms |  |
|  | balancing the checkbook/checking receipts against bank statements | giving money to hh child or hh adult |  |
|  | checking/trading/buying/selling stocks | borrowing/lending money (not banking) |  |
|  | researching investments | looking at bills |  |
| 80201 | banking |  | 3590 |
|  | doing banking | finding out information about loans |  |
|  | making a withdrawal, deposit, transfer | meeting with loan officer |  |
|  | applying for a loan or mortgage | talking to/with the bank manager |  |
|  | filling in loan applications | talking to/with a teller |  |
|  | using the ATM | talking to/with a loan officer |  |
|  | checking a bank account online | applying for a loan online |  |
| 80202 | using other financial services |  | 154 |
|  | meeting with an accountant | meeting with claims adjuster |  |
|  | meeting with stockbroker | talking to/with claims adjusters |  |
|  | completing a credit card application | talking to/with an accountant |  |
|  | meeting w/insurance agent | talking to/with stock broker |  |
|  | talking to/with insurance agents | applying for a credit card online |  |
| 80203 | waiting associated with banking/financial services |  | 53 |
|  | waiting in line at the bank |  |  |
| 180802 | travel related to using financial services and banking |  | 3650 |
| **Animal Care** |  |  | **21403** |
| 180903 | travel related to using pet services (not vet) |  | 128 |
| 180807 | travel related to using veterinary services |  | 244 |
| 20699 | pet and animal care |  | 20699 |
| 80701 | using veterinary services |  | 169 |
|  | purchasing medicine for a pet | talking to/with vet assistant/vet tech. |  |
|  | paying for veterinary services | paying for pet health insurance |  |
|  | talking to/with vet |  |  |
| 80702 | waiting associated with veterinary services |  | 55 |
|  | waiting for the vet |  |  |
| 90301 | using pet services |  | 108 |
|  | attending animal obedience classes | hiring a pet trainer |  |
|  | hiring a pet sitter/walker | meeting with pet trainer |  |
|  | paying the pet sitter/walker | meeting with kennel caretakers |  |
|  | talking to/with animal trainer | talking to/with animal caretaker |  |
|  | talking to/with the groomer | paying the pet groomer |  |
|  | talking to/with the pet sitter | paying the animal trainer |  |
| **Vehicle Maintenance** |  |  | **5897** |
| 20701 | vehicle repair and maintenance (by self) |  | 3442 |
|  | changing oil | changing wheel on motorcycle |  |
|  | adding oil | putting new chain on bicycle |  |
|  | putting air in tires | filling brake fluid |  |
|  | charging battery | checking battery |  |
|  | filling radiator | restoring car |  |
|  | changing spark plugs | checking tire pressure |  |
|  | washing/waxing cars or other vehicles | cleaning boat |  |
|  | replacing vehicle headlights | fixing bike |  |
|  | putting protective cover on vehicle | fixing motorcycle |  |
|  | scraping ice/snow off vehicle | cleaning/vacuuming vehicles |  |
|  | checking fluids | replacing vehicle taillights |  |
|  | changing/rotating tires | installing car CD player |  |
|  | replacing brakes | putting on registration stickers |  |
|  | adding equipment to vehicles | putting car/vehicle in garage |  |
|  | installing car stereo/speakers | checking tires |  |
|  | putting on license plates/tags | assembling bicycle |  |
|  | overhauling engine | rebuilding engine |  |
|  | doing a ring job | covering boat |  |
|  | doing a valve job | installing a trailer hitch |  |
|  | tuning up vehicles | hooking up trailer to car/truck |  |
|  | cleaning camper/RV | winterizing boat |  |
|  | checking to make sure car was locked |  |  |
| 20799 | vehicles |  | 74 |
| 90501 | using vehicle maintenance or repair services |  | 727 |
|  | paying for a tune-up/oil change | talking to/with mechanic |  |
|  | paying for a car wash | talking to/with auto body repair person |  |
|  | paying for repair work done on car | paying a mechanic |  |
|  | talking to/with service person |  |  |
| 90502 | waiting associated with vehicle maintenance or repair svcs |  | 422 |
|  | waiting while car is repaired | watching car being washed |  |
|  | waiting while car is washed |  |  |
| 180905 | travel related to using vehicle maintenance & repair services |  | 1232 |
| **Household Care** |  |  | **151175** |
| 20101 | interior cleaning |  | 38563 |
|  | tidying up | picking up clothes |  |
|  | recycling/sorting newspapers for recycling | straightening up the house |  |
|  | cleaning windows/washing walls | picking up the house/cleaning the house |  |
|  | vacuuming/sweeping floors/sweeping | washing floor |  |
|  | making the bed/changing sheets | cleaning out drawers |  |
|  | cleaning bathrooms/cleaning bedroom | emptying ashtray |  |
|  | cleaning carpets/shampooing carpet | cleaning bathtub/cleaning toilet |  |
|  | polishing furniture/dusting | cleaning out closet |  |
|  | emptying trash cans/taking out the trash | scrubbing |  |
|  | cleaning cupboards | cleaning floors/mopping floors |  |
|  | picking up toys |  |  |
| 20102 | laundry |  | 26117 |
|  | putting laundry in washer/dryer | bringing in washing/laundry |  |
|  | hanging clothes on clothesline | putting towels in bathroom |  |
|  | sorting laundry/folding clean laundry | hand washing clothing |  |
|  | treating stains/spot treating clothes | taking clothes off the line |  |
|  | ironing | taking clothes out of washer |  |
|  | putting clean laundry away | washing curtains |  |
|  | putting out clean towels | folding clothes/hanging clothes |  |
|  | removing lint from dryer | adding fabric softener |  |
|  | doing laundry/checking wash |  |  |
| 20103 | sewing, repairing, & maintaining textiles |  | 1649 |
|  | sewing on buttons/hemming garmets | polishing shoes |  |
|  | sewing a new dress/clothing | repairing/caring for clothes/hats/shoes/curtains |  |
|  | sewing curtains/other hh items | cleaning shoes/sneakers |  |
|  | knitting/crocheting blankets | knitting/crocheting sweaters, clothing |  |
|  | altering clothing/sewing hem | crocheting/crocheting quilt |  |
| 20104 | storing interior hh items, inc. food |  | 9633 |
|  | putting away the groceries/putting shopping away | boxing things up for storage |  |
|  | storing food/storing the groceries | putting away decorations/Christmas decorations/holiday items |  |
|  | moving stuff to attic/basement |  |  |
| 20199 | housework, n.e.c.* |  | 73 |
| 20301 | interior arrangement, decoration, & repairs |  | 3380 |
|  | decorating | fumigating house |  |
|  | moving/rearranging furniture | measuring windows for curtains |  |
|  | hanging pictures | making plumbing improvements |  |
|  | hanging curtains/wallpaper | stripping paint |  |
|  | painting | stripping wallpaper |  |
|  | laying linoleum/tile/wood floors | installing carpet |  |
|  | refitting kitchen/bathroom | hanging blinds/shades |  |
|  | remodeling interior of house | taking down towel bars |  |
|  | fixing leaks | decorating the Christmas tree |  |
|  | plastering | carving jack-o-lanterns |  |
|  | putting up shelves | setting up a manger (inside) |  |
|  | replacing fuses | hanging Christmas stockings |  |
|  | changing light bulbs | putting up Christmas decorations (inside) |  |
|  | putting up Christmas lights (inside) | setting up menorah candles (inside) |  |
|  | setting mousetraps |  |  |
| 20302 | building and repairing furniture |  | 367 |
|  | making furniture | making cabinets |  |
|  | refinishing furniture | stripping furniture |  |
|  | reupholstering furniture | sanding wood furniture |  |
|  | refinishing wood furniture | staining wood furniture |  |
|  | repairs to furniture | changing cabinet hardware |  |
|  | painting furniture | assembling furniture |  |
| 20303 | heating and cooling |  | 1194 |
|  | chopping wood | collecting wood |  |
|  | lighting fireplace | stacking firewood |  |
|  | bringing in wood/kindling | setting the fire |  |
|  | shoveling coal | installing wood burning stove |  |
|  | filling heater with fuel | installing fireplace |  |
|  | installing window AC unit | opening/closing windows |  |
|  | changing furnace filter |  |  |
| 20399 | interior maintenance, repair, & decoration, n.e.c.* |  | 39 |
| 20401 | exterior cleaning |  | 2950 |
|  | sweeping deck/patio/porch | cleaning shed |  |
|  | sweeping steps | sweeping garage |  |
|  | shoveling snow | cleaning chimney |  |
|  | removing ice from walkways | washing outside windows |  |
|  | putting away yard equipment | picking up trash that blew into yard |  |
|  | putting away bicycles | sweeping sidewalk |  |
|  | cleaning gutters | putting away outside toys |  |
|  | cleaning garage |  |  |
| 20402 | exterior repair, improvements, & decoration |  | 1440 |
|  | painting/staining porch/deck | painting house exterior |  |
|  | fixing the roof | fixing mailbox |  |
|  | fixing broken windows | staining house exterior |  |
|  | replacing screens | fixing weatherboards |  |
|  | building a deck | fixing bird feeder |  |
|  | building a garage/carport | building a fence |  |
|  | building a shed | painting or staining fence |  |
|  | putting new roof on house | putting new roof on garage |  |
|  | adding another room to house | setting up garden furniture |  |
|  | screening in a porch | decorating outside for holidays |  |
|  | installing a gate or fence | hanging flags |  |
|  | paving or blacktopping | hanging address numbers |  |
|  | making structural additions | working on boat lift |  |
|  | hanging outdoor lights | repairing boat dock |  |
|  | decorating outside for parties | hanging up wind chimes |  |
|  | putting up outdoor holiday decorations | repairing wind chimes |  |
|  | putting up Christmas lights (outside) | putting up Christmas decorations (outside) |  |
| 20499 | exterior maintenance, repair & decoration, n.e.c.* |  | 61 |
| 20501 | lawn, garden, and houseplant care |  | 14216 |
|  | applying pesticides | picking fruit and vegetables |  |
|  | spraying for bugs | gathering nuts |  |
|  | gardening | collecting eggs, honey |  |
|  | doing yard work | planting tomatoes |  |
|  | trimming branches/hedges | digging in the vegetable garden |  |
|  | pruning shrubs/flowers | laying paving stones |  |
|  | picking up branches, twigs | fertilizing garden |  |
|  | raking leaves | planting beans |  |
|  | blowing leaves | planting fruit tree |  |
|  | planting | pruning tree |  |
|  | mulching | putting snail killer around vegetables |  |
|  | watering houseplants | sowing flower or vegetable seeds |  |
|  | weeding | spraying fruit trees |  |
|  | cutting the grass | spraying rose bushes |  |
|  | mowing the lawn | tying up tomatoes |  |
|  | edging | putting pesticides on lawn |  |
|  | adding chemicals to lawn | turning sprinkler on or off |  |
|  | fertilizing the lawn | watering outdoor plants |  |
|  | spreading mulch | hunting mushrooms |  |
|  | watering lawn/garden | weeding vegetable garden |  |
|  | seeding | weeding flower garden |  |
|  | planting fruit and vegetables |  |  |
| 20502 | ponds, pools, and hot tubs |  | 492 |
|  | adding chemicals to pool | draining pool |  |
|  | chlorinating the pool | filling the pool |  |
|  | cleaning the pond, pool, hot tub | adding chemicals to hot tub |  |
|  | putting in a pond, pool, hot tub | testing ph in water |  |
|  | repairing pond, pool, hot tub | turning on/off the hot tub |  |
|  | winterizing pool |  |  |
| 20902 | household & personal organization and planning |  | 18175 |
|  | making shopping lists | unpacking/packing recreational vehicle for trip |  |
|  | assigning chores | organizing file cabinet |  |
|  | getting organized for work (for self) | making photocopies (for self or hh) |  |
|  | organizing/planning hh parties or hh events | unloading groceries/shopping items |  |
|  | planning vacation/household trip | putting pictures in albums |  |
|  | planning household meals/menu | labeling videos |  |
|  | looking for misplaced items | organizing boxes in garage |  |
|  | borrowing/lending household items | unpacking/packing car for trip |  |
|  | carrying in groceries | packing boxes for household move or trip |  |
|  | sorting/doing/filling out paperwork | unwrapping/opening packages |  |
|  | sorting books/sorting household items | packing/unpacking bags or suitcase (for self) |  |
|  | filling a Christmas stocking/Easter basket | organizing school stuff (for self) |  |
|  | opening presents/gifts (alone) | wrapping presents |  |
|  | Loading/unloading the car | dropping off/picking up household items |  |
|  | looking at store purchases | making dinner reservations |  |
|  | making reservations |  |  |
| 20903 | HH & personal mail & messages (except e-mail) |  | 9353 |
|  | mailing letters, payments | collecting mail/reading mail |  |
|  | checking phone messages | writing Valentines/Christmas cards |  |
|  | sending reg./cert. packages/mail/express mail | mailing/picking up letters or packages |  |
|  | bringing in newspaper/mail | throwing away junk mail |  |
|  | writing letters/cards (personal or hh) | signing for certified mail |  |
|  | looking at/checking/sorting mail | addressing holiday cards |  |
|  | checking to see if mail came/getting mail in |  |  |
| 20904 | HH & personal e-mail and messages |  | 9199 |
|  | reading/sending e-mail (personal or hh) | cleaning out e-mail inbox (personal or hh) |  |
|  | instant messaging (personal) | reading/sending e-mail (unspecified) |  |
|  | checking e-mail (personal or hh) |  |  |
| 20905 | home security |  | 1894 |
|  | installing/maintaining smoke detectors | maintaining alarms/security systems |  |
|  | checking/changing locks | breaking into home if locked out |  |
|  | setting security alarm/installing alarms | closing house up |  |
|  | locking doors, windows/turning out the lights | closing the blinds/curtains |  |
|  | breaking into a locked house | locking up the house/locking up home |  |
|  | bolting doors/windows |  |  |
| 20999 | household management, n.e.c.* |  | 51 |
| 29999 | household activities, n.e.c.* |  | 215 |
|  | household emergency | putting out a kitchen fire |  |
|  | household accident |  |  |
| 90201 | using home maint/repair/decor/construction svcs |  | 182 |
|  | hiring an electrician or plumber | hiring someone to clean house siding |  |
|  | hiring/meeting w/interior designer | hiring/meeting w/interior decorator |  |
|  | hiring a prof. home remodeling svc. | hiring someone to repair house siding |  |
|  | hiring a contractor | meeting with a contractor |  |
|  | hiring/meeting with an architect | talking to/with electrician or plumber |  |
|  | paying to have your roof repaired | talking to/with the interior designer |  |
|  | hiring someone to build an addition | talking to/with the contractor |  |
|  | hiring appliance repairer | talking to/with computer technician |  |
|  | hiring someone to fix your computer | hiring movers |  |
|  | paying a contractor | talking to/meeting with movers |  |
|  | paying a plumber or electrician | paying a decorator |  |
|  | hiring window washers | hiring driveway pavers |  |
|  | hiring deck cleaners/refinishers |  |  |
| 90202 | waiting associated w/home main/repair/decor/constr |  | 101 |
|  | waiting for architect | waiting while repairs are made |  |
|  | watching repair person | watching movers |  |
|  | waiting for cleaners to finish |  |  |
| 90401 | using lawn and garden services |  | 24 |
|  | hiring a landscaper | talking to person who cuts your grass |  |
|  | hiring someone to water houseplants | hiring someone to water lawn/flowers |  |
|  | hiring someone to cut grass | hiring someone to shovel snow |  |
|  | meeting with landscaper | hiring someone to rake leaves |  |
|  | talking to/with a plant-sitter | paying the landscaper |  |
|  | talking to/with the landscaper |  |  |
| 180280 | travel related to housework |  | 11807 |
| **Household Care Services** |  |  | **627** |
| 90103 | using clothing repair and cleaning services |  | 602 |
|  | dropping off clothes at the dry cleaners | having a suit tailored |  |
|  | having a garment altered | having a dress hemmed |  |
|  | having shirts laundered | paying the drycleaner |  |
|  | picking up clothing at the dry cleaners | paying the tailor |  |
| 99999 | using household services, n.e.c.* |  | 25 |
|  | talking to telephone repairperson | using butchering services |  |
| **Study & Research** |  |  | **3616** |
| 60301 | research/homework for class for degree, certification, or licensure |  | 3198 |
|  | listening to language cd (degree, certificate, or licensure) | organizing notes (degree, certificate, or licensure) |  |
|  | writing paper/essay (degree, certificate, or licensure) | reading (degree, certificate, or licensure) |  |
|  | attending study group (degree, certificate, or licensure) | reading/sending e-mail (degree, certificate, or licensure) |  |
|  | studying (degree, certificate, or licensure) | reading the Bible/scriptures (degree, certificate, or licensure) |  |
| 60302 | research/homework for class for pers. interest |  | 325 |
|  | listening to language cd (class for personal int.) | organizing notes (class for personal int.) |  |
|  | writing paper/essay (class for personal int.) | reading (class for personal int.) |  |
|  | attending study group (class for personal int.) | reading/sending e-mail (class for personal int.) |  |
|  | studying (class for personal int.) |  |  |
| 60399 | research/homework n.e.c.* |  | 93 |
|  | studying for the SAT | studying for the CPA exam |  |
|  | studying for the GRE | preparing for SAT |  |
|  | studying for the LSAT | preparing for the GRE |  |
|  | studying for the GMAT | preparing for the LSAT |  |
| **Education & Class** |  |  | **3459** |
| 60101 | taking class for degree, certification, or licensure |  | 903 |
|  | attending class (degree, certificate, or license) | talking to classmates (degree, certificate, or license) |  |
|  | auditing a course (degree, certificate, or license) | listening to a lecture (degree, certificate, or license) |  |
|  | taking a field trip (degree, certificate, or license) | attending a seminar (degree, certificate, or license) |  |
|  | attending practicum/internships (degree, certificate, or license) | taking on-line course (degree, certificate, or license) |  |
|  | taking exams (degree, certificate, or license) | talking to teacher (degree, certificate, or license) |  |
| 60102 | taking class for personal interest |  | 452 |
|  | taking an art, craft, hobby, recreational course (personal int.) | taking driving lessons |  |
|  | attending Lamaze class | taking a car maintenance/repair class (personal int.) |  |
|  | taking a cooking class (personal int.) | dance class (personal int.) |  |
|  | taking a financial planning class (personal int.) | taking a sewing class (personal int.) |  |
|  | taking a retirement planning seminar | taking a pottery class (personal int.) |  |
|  | taking personal development classes (personal int.) | taking a wine appreciation class (personal int.) |  |
|  | taking music/voice lessons (personal int.) | taking parenting class |  |
|  | taking photography class (personal int.) | taking a massage class (personal int.) |  |
|  | taking academic class (personal int.) | taking on-line course (personal interest) |  |
|  | taking CPR, first aid (personal int.) | talking to teacher (class for personal int.) |  |
|  | prenatal/child care classes (personal int.) | talking to classmates (class for personal int.) |  |
|  | taking self-defense (personal int.) | taking driver's education |  |
| 60103 | waiting associated with taking classes |  | 69 |
|  | waiting for the teacher |  |  |
| 60199 | taking classes,n.e.c.* |  | 27 |
|  | attending class, reason unknown | taking GRE prep course |  |
|  | taking a CPA prep course | taking SAT prep course |  |
|  | having detention | taking GMAT prep course |  |
|  | attending study hall | taking LSAT prep course |  |
|  | having a free period |  |  |
| 180601 | travel related to taking class |  | 2008 |
| **Volunteerism** |  |  | **13921** |
| 150106 | fundraising |  | 176 |
|  | collecting monetary donations (volunteer) | ringing a bell for the Salvation Army (volunteer) |  |
|  | raising money for charitable causes (volunteer) | selling nonfood items at a concession stand (volunteer) |  |
|  | raising money for political candidates (volunteer) | helping with a yard sale (volunteer) |  |
|  | selling items at a yard sale (volunteer) | selling items at a bazaar (volunteer) |  |
|  | soliciting pledges (volunteer) | selling raffle tickets (volunteer) |  |
|  | selling tickets (volunteer) | setting up a silent auction (volunteer) |  |
|  | planning a benefit (volunteer) | selling Girl Scout cookies (volunteer) |  |
| 150201 | food preparation, presentation, clean-up |  | 462 |
|  | working in a soup kitchen (volunteer) | distributing groceries at food bank (volunteer) |  |
|  | preparing food for a fundraiser (volunteer) | serving food at a homeless shelter (volunteer) |  |
|  | delivering/serving meals to shut-ins (volunteer) | selling food or unknown items at a concession stand (volunteer) |  |
|  | baking cookies for the PTA bake sale (volunteer) | donating food to a food bank (volunteer) |  |
| 150202 | collecting & delivering clothing & other goods |  | 196 |
|  | collecting clothing for disaster relief (volunteer) | donating clothing (volunteer) |  |
|  | distributing blankets at a homeless shelter (volunteer) | sorting books (volunteer) |  |
|  | donating books (volunteer) | sorting clothing (volunteer) |  |
|  | assembling gift baskets (volunteer) | loading items into vehicle (volunteer) |  |
|  | donating tooys (voluteer) | unloading items from vehicle (volunteer) |  |
|  | collecting toys (volunteer) | collecting school supplies (volunteer) |  |
|  | collecting used electronics (volunteer) |  |  |
| 150203 | providing care |  | 110 |
|  | visiting shut-ins or the elderly (volunteer) | spending time with hospice patients (volunteer) |  |
|  | reading to the blind (volunteer) | walking dogs at animal shelter (volunteer) |  |
|  | acting as an interpreter (volunteer) | playing with children (volunteer) |  |
|  | visiting with others (volunteer) | chaperoning (volunteer) |  |
|  | supervising children (volunteer) |  |  |
| 150204 | teaching, leading, counseling, mentoring |  | 882 |
|  | being a Big Brother/Big Sister (volunteer) | counseling at a halfway house (volunteer) |  |
|  | tutoring (volunteer) | leading Boy Scout meeting (volunteer) |  |
|  | working a hotline for victim support svcs. (volunteer) | teaching/leading Bible study (volunteer) |  |
|  | coaching teams (volunteer) | teaching bat/bar mitzvah class (volunteer) |  |
|  | assisting in a classroom (volunteer) | teaching/leading religious class (volunteer) |  |
|  | leading religious youth group (volunteer) | teaching confirmation class (volunteer) |  |
|  | teaching Sunday school (volunteer) | teaching religious class (volunteer) |  |
|  | teaching parenting classes (volunteer) | leading a blessing (volunteer) |  |
|  | doing vocational training (volunteer) | teaching a cooking class (volunteer) |  |
|  | leading a tour (volunteer) | leading a choir (volunteer) |  |
|  | teaching a class (volunteer) | leading a musical group (volunteer) |  |
|  | leading story time at library (volunteer) | providing a demo (volunteer) |  |
| 150299 | social service & care activities, n.e.c.* |  | 103 |
|  | sewing items to donate (volunteer) | knitting (volunteer) |  |
|  | making quilts for soldiers (volunteer) | making crafts (volunteer) |  |
| 150302 | indoor & outdoor maintenance, repair, & clean-up |  | 380 |
|  | cleaning parks/streets (volunteer) | doing environmental clean-up (volunteer) |  |
|  | picking up trash (volunteer) | repairing cars (volunteer) |  |
|  | renovating a house (volunteer) | maintaining hiking trails (volunteer) |  |
|  | repairing tools or equipment (volunteer) | planting trees (volunteer) |  |
|  | gardening (volunteer) | watering trees (volunteer) |  |
|  | weeding (volunteer) | clearing brush (volunteer) |  |
|  | planting flowers (volunteer) | landscaping (volunteer) |  |
|  | mowing the lawn (volunteer) | painting (volunteer) |  |
|  | cleaning up yards, buildings (volunteer) |  |  |
| 150401 | performing |  | 219 |
|  | acting in a performance (volunteer) | emceeing a charity function (volunteer) |  |
|  | dancing in a performance (volunteer) | auctioneering a benefit auction (volunteer) |  |
|  | performing music (volunteer) | practicing for a performance (volunteer) |  |
| 150601 | public health activities |  | 30 |
|  | donating blood (volunteer) | providing medical care (volunteer) |  |
| 150602 | public safety activities |  | 26 |
|  | being on duty as firefighter (volunteer) | patrolling for neighborhood crime watch (volunteer) |  |
| 159989 | volunteer activities, n.e.c.* |  | 1681 |
| 181501 | travel related to volunteering |  | 5904 |
| 181599 | travel related to volunteer activities, n.e.c.* |  | 176 |
| 150102 | organizing and preparing |  | 1026 |
|  | preparing for a meeting (volunteer) | filing (volunteer) |  |
|  | organizing volunteer materials | preparing/organizing schedules (volunteer) |  |
|  | stuffing envelopes (volunteer) | addressing envelopes (volunteer) |  |
|  | completing paperwork (volunteer) | re-shelving library books (volunteer) |  |
|  | reviewing applications (volunteer) |  |  |
| 150101 | computer use |  | 1191 |
|  | writing/sending e-mail (volunteer) | computer use, unspecified (volunteer) |  |
|  | checking e-mail (volunteer) | surfing the internet (volunteer) |  |
|  | designing website for volunteer org. | setting up computer (volunteer) |  |
|  | loading computer software (volunteer) |  |  |
| 150103 | reading |  | 232 |
|  | reviewing notes, briefs, papers (volunteer) | reading the Bible (volunteer) |  |
|  | reading books, journals, newspapers (volunteer) | reading scriptures (volunteer) |  |
| 150104 | telephone calls (except hotline counseling) |  | 665 |
| fundraising | making phone calls (volunteer) | answering phones (volunteer) |  |
| 150105 | writing |  | 131 |
|  | editing newsletters (volunteer) | writing letters/memos (volunteer) |  |
| 150106 | fundraising |  | 176 |
|  | collecting monetary donations (volunteer) | ringing a bell for the Salvation Army (volunteer) |  |
|  | raising money for charitable causes (volunteer) | selling nonfood items at a concession stand (volunteer) |  |
|  | raising money for political candidates (volunteer) | helping with a yard sale (volunteer) |  |
|  | selling items at a yard sale (volunteer) | selling items at a bazaar (volunteer) |  |
|  | soliciting pledges (volunteer) | selling raffle tickets (volunteer) |  |
|  | selling tickets (volunteer) | setting up a silent auction (volunteer) |  |
|  | planning a benefit (volunteer) | selling Girl Scout cookies (volunteer) |  |
| 150199 | administrative & support activities, n.e.c.* |  | 374 |
|  | counted church offering (volunteer) | collecting signatures for a petition (volunteer) |  |
| **Hobbies & Leisure** |  |  | **195582** |
| 120301 | relaxing, thinking |  | 23827 |
|  | doing nothing/goofing off/wasting time | sunbathing |  |
|  | hanging around/hanging out (alone) | grieving |  |
|  | sitting in the hot tub/Jacuzzi/whirlpool/sauna | worrying/crying |  |
|  | breaks at work, unspecified activity | watching husband assemble lawnmower |  |
|  | watching wife garden/watching husband cook dinner | resting/relaxing/lounging |  |
|  | lying around/sitting around | reflecting/daydreaming/fantasizing/wondering |  |
| 120306 | listening to/playing music (not radio) |  | 2096 |
|  | listening to recorded music/records/CDs/DVDs/tapes | listening to someone play the piano |  |
|  | playing musical instrument (leisure) | composing music |  |
|  | singing/singing karaoke/Christmas caroling | tuning musical instruments |  |
| 120307 | playing games |  | 9117 |
|  | playing board games/Scrabble/cards | hitting a pinata |  |
|  | playing computer games/playing games over the Internet | spinning dreidels |  |
|  | hiding matzo (Passover)/hiding Easter eggs | working jigsaw puzzles/crossword puzzles |  |
| 120308 | computer use for leisure (ex. Games) |  | 13071 |
|  | computer use, unspecified | computer use, leisure (personal interest) |  |
|  | surfing the internet/web (personal interest) | browsing on the internet (personal interest) |  |
|  | downloading files, music, pictures (personal interest) | participating in a chat room (personal interest) |  |
|  | burning CDs (personal interest) | designing/updating website (personal interest) |  |
|  | Using Twitter or tweeting (personal interest) | checking Facebook (personal interest) |  |
|  | writing computer software (personal interest) | computer programming (personal interest) |  |
|  | checking MySpace (personal interest) |  |  |
| 120312 | reading for personal interest |  | 36514 |
|  | reading a magazine/book/newspaper (personal interest) | checking out library books (personal int) |  |
|  | flipping/leafing through magazine (personal interest) | being read to (personal interest) |  |
|  | listening to books on tape (personal interest) | reading, unspecified |  |
|  | borrowing books from the library (pers. interest) | returning library books/browsing at the library |  |
|  | doing research (personal interest) | reading a book on a Kindle or other electronic book reader (personal interest) |  |
| 120313 | writing for personal interest |  | 353 |
|  | writing in diary/journal (personal interest) | writing stories (personal interest) |  |
|  | writing lyrics | editing (personal interest) |  |
|  | blogging (personal interest) |  |  |
| 120399 | relaxing and leisure, n.e.c.* |  | 278 |
|  | looking at pictures in photo album | looking at photos on computer or camera |  |
| 120303 | television and movies (not religious) |  | 108628 |
|  | watching TV or a DVD/video/instructional video | watching home movies/home videos |  |
|  | setting the VCR or DVD player | borrowing movies from or returning movies to the library |  |
|  | watching videos on YouTube | watching TV/DVDs on computer (personal interest) |  |
|  | setting TiVo/DVR |  |  |
| 120309 | arts and crafts as a hobby |  | 1392 |
|  | scrapbooking, making a scrapbook | making Halloween costumes (for self) |  |
|  | making holiday/other decorations | dyeing Easter eggs |  |
|  | videotaping/photography/model making/jewelry making | artistic painting |  |
|  | making pottery/sculpting/wood working | making Christmas decorations |  |
|  | taking pictures/snapshots/photographs |  |  |
| 120310 | collecting as a hobby |  | 40 |
|  | collecting/organizing stamps or coin collection |  |  |
| 120311 | hobbies, except arts & crafts and collecting |  | 266 |
| **Income Generating Activities** |  |  | **922** |
| 050301 | income-generating hobbies, crafts, and food |  | 133 |
|  | preparing food or drink for sale | making baskets for sale |  |
|  | drawing, painting, or sketching for sale | doing woodworking for sale |  |
|  | making pottery for sale | making tapestries/quilts for sale |  |
|  | making furniture for sale | making dinners for sale |  |
| 050303 | income-generating services |  | 251 |
|  | babysitting for pay | shoveling snow for pay |  |
|  | mowing lawns for pay | home improvements for pay |  |
|  | doing household chores for pay | typing paper for pay |  |
| 050304 | income-generating rental property activities |  | 81 |
|  | maintaining/renovating rental property | making repairs to rental property |  |
| 050305 | waiting associated with other income-generating activities |  | 457 |
| **Job Searching** |  |  | **1536** |
| 050403 | job interviewing |  | 60 |
|  | interviewing by phone or in person | preparing for interview |  |
|  | scheduling/canceling interview (for self) |  |  |
| 050404 | waiting associated with job search or interview |  | 43 |
|  | waiting to go in for an interview |  |  |
| 50481 | job search activities |  | 1406 |
| 50499 | job search and interviewing, n.e.c.* |  | 27 |
| **Work** |  |  | **89604** |
| 050101 | work, main job |  | 42746 |
|  | at work (main job) | putting in overtime at work (main job) |  |
|  | working extra hours (main job) | talking to instructor (class for main job) |  |
|  | on-the-job training (main job) | surfing the Internet (main job) |  |
|  | reading and writing (main job) | doing research/homework (main job) |  |
|  | computer use (main job) | registering for class (main job) |  |
|  | telephone calls (main job) | attending typing training (main job) |  |
|  | attending class (main job) | phone calls to/from supervisors (main job) |  |
|  | registering for training (main job) | phone calls to/from customers (main job) |  |
|  | attending conferences/convention (main job) | leading a blessing (main job) |  |
|  | making reserv. on the Internet (main job) | phone calls to/from coworkers (main job) |  |
|  | teaching/leading Bible study (main job) | phone calls to/from clients (main job) |  |
|  | leading religious youth group (main job) | attending sales training (main job) |  |
|  | reading the Bible/Torah/scriptures (main job) | teaching bat/bar mitzvah class (main job) |  |
|  | teaching confirmation class (main job) | teaching religious class (main job) |  |
|  | organizing/preparing materials (main job) | hearing confession (main job) |  |
|  | designing/updating a website (main job) | marking assignments (main job) |  |
|  | reading a book/other material (main job) | checking e-mail (main job) |  |
|  | reviewing notes, briefs, or papers (main job) | calling leads for stories/information (main job) |  |
|  | preparing lesson plans/grading papers (main job) | enrollment in training/classes (main job) |  |
|  | writing memos/papers/letters (main job) | talking to other conference attendees (main job) |  |
|  | checking voicemail messages (main job) | reading/sending e-mail (main job) |  |
| 050102 | work, other job(s) |  | 2859 |
|  | at work (other job) | hearing confession (other job) |  |
|  | extra hours at other job | phone calls to/from coworkers (other job) |  |
|  | on-the-job training (other job) | phone calls to/from clients (other job) |  |
|  | reading and writing (other job) | attending typing training (other job) |  |
|  | computer use (other job) | teaching confirmation class (other job) |  |
|  | telephone calls (other job) | phone calls to/from supervisors (other job) |  |
|  | attending class (other job) | phone calls to/from customers (other job) |  |
|  | registering for training (other job) | checking e-mail (other job) |  |
|  | attending conferences/convention (other job) | teaching bat/bar mitzvah class (other job) |  |
|  | talking to instructor (class for other job) | moonlighting |  |
|  | reading the Bible/Torah/scriptures (other job) | leading a blessing (other job) |  |
|  | teaching/leading Bible study (other job) | attending sales training (other job) |  |
|  | leading religious youth group (other job) | doing research/homework (other job) |  |
|  | surfing the Internet (other job) | calling leads for stories/information (other job) |  |
|  | organizing/preparing materials (other job) | teaching religious class (other job) |  |
|  | reading a book/other material (other job) | enrollment in training/classes (other job) |  |
|  | reviewing notes, briefs, or papers (other job) | making reserv. on the Internet (other job) |  |
|  | preparing lesson plans/grading papers (other job) | checking voicemail messages (other job) |  |
|  | writing memos/papers/letters (other job) | registering for class (other job) |  |
|  | marking assignments (other job) | talking to other conference attendees (other job) |  |
|  | designing/updating a website (other job) | reading/sending e-mail (other job) |  |
| 050103 | security procedures related to work |  | 56 |
|  | opening bags for security search (work) | passing through metal detector (work) |  |
|  | being searched at security checkpoint (work) |  |  |
| 50189 | working, n.e.c.* |  | 570 |
| 050201 | socializing, relaxing, and leisure as part of job |  | 35 |
|  | attending social event w/coworkers (part of job) | attending social event w/bosses (part of job) |  |
|  | talking w/co-workers at social event (part of job) | talking w/clients at social event (part of job) |  |
| 050202 | eating and drinking as part of job |  | 252 |
|  | eating/drinking w/clients (part of job) | eating/drinking w/bosses (part of job) |  |
|  | eating/drinking w/customers (part of job) | having lunch/dinner w/clients (part of job) |  |
|  | eating/drinking w/coworkers (part of job) |  |  |
| 050289 | work-related activities, n.e.c.* |  | 128 |
| 180501 | travel related to working |  | 40823 |
| 180502 | travel related to work-related activities |  | 1242 |
| 180589 | travel related to work, n.e.c.* |  | 893 |
